# Supplementary material for: Can SBAR be implemented with high fidelity and does it improve communication between healthcare workers? A systematic review
Source: PubMed Central journal article supplement — BMJ Open. 2021 Dec 17;11(12):e055247. doi: 10.1136/bmjopen-2021-055247 (PMC8685965; doi:10.1136/bmjopen-2021-055247), 2021-12-17
Supplement: bmjopen-2021-055247supp001.pdf [file bmjopen-2021-055247supp001.pdf]

## Supplementary Materials

Appendix A. Full search strategy (completed on October 23, 2020)

### 1) Database

**Ovid MEDLINE**: Epub Ahead of Print, In-Process & Other Non-Indexed Citations, Ovid MEDLINE® Daily and Ovid MEDLINE® 1946-Present, **Embase Classic+Embase** 1947 to 2020 October 22, **PsycINFO** 1806 to October Week 2 2020, **Ovid Healthstar** 1966 to August 2020

|   | Searches                                                     | Results |
|---|--------------------------------------------------------------|---------|
| 1 | sbar.mp.                                                     | 798     |
| 2 | (situation adj4 background adj4 assess* adj4 recommend*).mp. | 640     |
| 3 | 1 or 2                                                       | 965     |
| 4 | remove duplicates from 3                                     | 503     |

### CINAHL

|    | Searches                                              | Results |
|----|-------------------------------------------------------|---------|
| S1 | (MH "SBAR Technique")                                 | 142     |
| S2 | TX sbar                                               | 389     |
| S3 | TX (situation N4 background N4 assess* N4 recommend*) | 219     |
| S4 | S1 OR S2 OR S3                                        | 432     |
|    | Limited to Academic Journals                          | 331     |

## 2) Hand search:

Variants of SBAR (ISBAR, ISBARR, ISoBAR, ISBARQ, SBARR) were hand searched as keywords within Pubmed, retrieving 48 results (25 after dedup).

Relevant journals in quality improvement and patient safety (BMJ Quality and Safety, Journal of Patient Safety, International Journal for Quality in Health Care, American Journal of Medical Quality, Journal for Healthcare Quality, and The Joint Commission Journal of Quality and Patient Safety) searched for SBAR as keyword, retrieving 3 results not found from database searches.

## Appendix B: Supplementary Tables and Figures

Supplementary Table 1 Representative excluded studies and reasons for exclusion

| Study                                                                                                                                                                                                    | Reason for Exclusion                                        |
|----------------------------------------------------------------------------------------------------------------------------------------------------------------------------------------------------------|-------------------------------------------------------------|
| Campbell D, Dontje K. Implementing Bedside Handoff in the Emergency Department: A Practice Improvement Project. <i>J Emerg Nurs</i> . 2019;45(2):149-154.                                                | Critical risk of bias                                       |
| Christie P, Robinson H. Using a communication framework at handover to boost patient outcomes. <i>Nurs Times</i> . 2009;105(47):13-15.                                                                   | Critical risk of bias                                       |
| Freitag M, Carroll VS. Handoff communication: using failure modes and effects analysis to improve the transition in care process. <i>Qual Manag Health Care</i> . 2011;20(2):103-109.                    | Critical risk of bias                                       |
| Haig KM, Sutton S, Whittington J. SBAR: a shared mental model for improving communication between clinicians. <i>Jt Comm J Qual Patient Saf</i> . 2006;32(3):167-175                                     | Critical risk of bias                                       |
| Hamilton P, Gemeinhardt G, Mancuso P, et al. SBAR and nurse-physician communication: Pilot testing an educational intervention. <i>Nurs Adm Q</i> . 2006;30(3):295-299.                                  | Critical risk of bias                                       |
| Martin HA, Ciurzynski SM. Situation, background, assessment, and recommendation—Guided huddles improve communication and teamwork in the emergency department. <i>J Emerg Nurs</i> . 2015;41(6):484-488. | Critical risk of bias                                       |
| Ashcraft AS, Owen DC. Comparison of standardized and customized SBAR communication tools to prevent nursing home resident transfer. <i>Appl Nurs Res</i> . 2017;38:64-69.                                | Ineligible design (head-to-head comparison with no control) |
| Compton J, Copeland K, Flanders S, et al. Implementing SBAR across a large multihospital health system. <i>Jt Comm J Qual Patient Saf</i> . 2012;38(6):261-268.                                          | Ineligible design (post-intervention data with no control)  |

|                                                                                                                                                                                                                                               |                                                                                |
|-----------------------------------------------------------------------------------------------------------------------------------------------------------------------------------------------------------------------------------------------|--------------------------------------------------------------------------------|
| Fabila TS, Hee HI, Sultana R, Assam PN, Kiew A, Chan YH. Improving postoperative handover from anaesthetists to non-anaesthetists in a children's intensive care unit: the receiver's perception. <i>Singapore Med J.</i> 2016;57(5):242-253. | Ineligible design (head-to-head comparison of SBAR techniques with no control) |
| Vardaman JM, Cornell P, Gondo MB, Amis JM, Townsend-Gervis M, Thetford C. Beyond communication: the role of standardized protocols in a changing health care environment. <i>Health Care Manage Rev.</i> 2012;37(1):88-97.                    | Ineligible design (qualitative)                                                |
| van der Wulp I, Poot EP, Nanayakkara PWB, Loer SA, Wagner C. Handover Structure and Quality in the Acute Medical Assessment Unit: A Prospective Observational Study. <i>J Patient Saf.</i> 2019;15(3):224-229.                                | Ineligible design (post-intervention data with no control)                     |
| Zabar S, Adams J, Kurland S, et al. Charting a Key Competency Domain: Understanding Resident Physician Interprofessional Collaboration (IPC) Skills. <i>J Gen Intern Med.</i> 2016;31(8):846-853.                                             | Ineligible design (post-intervention data with no control)                     |
| Blyth C, Bost N, Shiels S. Impact of an education session on clinical handover between medical shifts in an emergency department: A pilot study. <i>Emerg Med Australas.</i> 2017;29(3):336-341.                                              | No eligible outcome (only one observer judged fidelity to SBAR)                |
| Bowling AM. The effect of simulation on skill performance: a need for change in pediatric nursing education. <i>J Pediatr Nurs.</i> 2015;30(3):439-446.                                                                                       | No eligible outcome (only one observer judged fidelity to SBAR)                |
| Brust-Sisti LA, Sturgill M, Volino LR. Situation, background, assessment, recommendation (SBAR) technique education enhances pharmacy student communication ability and confidence. <i>Curr Pharm Teach Learn.</i> 2019;11(4):409-416.        | No eligible outcome (only one observer judged clarity of communication)        |
| Cornell P, Gervis MT, Yates L, Vardaman JM. Improving shift report focus and consistency with the situation, background, assessment, recommendation protocol. <i>J Nurs Adm.</i> 2013;43(7-8):422-428.                                        | No eligible outcome (focused on average time for shift reports)                |

|                                                                                                                                                                                                                                                                       |                                                                                    |
|-----------------------------------------------------------------------------------------------------------------------------------------------------------------------------------------------------------------------------------------------------------------------|------------------------------------------------------------------------------------|
| Eberhardt S. Improve handoff communication with SBAR. <i>Nursing</i> . 2014;44(11):17-20.                                                                                                                                                                             | No eligible outcome (focused on compliance with documentation)                     |
| Fahim Yegane SA, Shahrami A, Hatamabadi HR, Hosseini-Zijoud SM. Clinical Information Transfer between EMS Staff and Emergency Medicine Assistants during Handover of Trauma Patients. <i>Prehosp Disaster Med</i> . 2017;32(5):541-547.                               | No eligible outcome (only one observer judged fidelity to SBAR)                    |
| Halterman RS, Gaber M, Janjua MST, Hogan GT, Cartwright SMI. Use of a Checklist for the Postanesthesia Care Unit Patient Handoff. <i>J Perianesth Nurs</i> . 2019;34(4):834-841.                                                                                      | No eligible outcome (only one observer judged fidelity and communication outcomes) |
| Joffe E, Turley JP, Hwang KO, Johnson TR, Johnson CW, Bernstam EV. Evaluation of a problem-specific SBAR tool to improve after-hours nurse-physician phone communication: a randomized trial. <i>Jt Comm J Qual Patient Saf</i> . 2013;39(11):495-501.                | No eligible outcome (only one observer judged fidelity to SBAR)                    |
| Kitney P, Tam R, Bennett P, Buttigieg D, Bramley D, Wang W. Handover between anaesthetists and post-anaesthetic care unit nursing staff using ISBAR principles: A quality improvement study. <i>Journal of Perioperative Nursing in Australia</i> . 2017;35(1):13-18. | No eligible outcome (only one observer judged communication outcomes)              |
| Lautz AJ, Martin KC, Nishisaki A, et al. Focused Training for the Handover of Critical Patient Information During Simulated Pediatric Emergencies. <i>Hosp Pediatr</i> . 2018;8(4):227-231.                                                                           | No eligible outcome (only one observer judged clarity of communication)            |
| Moseley BD, Smith JH, Diaz-Medina GE, et al. Standardized sign-out improves completeness and perceived accuracy of inpatient neurology handoffs. <i>Neurology</i> . 2012;79(10):1060-1064.                                                                            | No eligible outcome (self-reported knowledge and attitudes to SBAR)                |

|                                                                                                                                                                                                                                                                                  |                                                                                               |
|----------------------------------------------------------------------------------------------------------------------------------------------------------------------------------------------------------------------------------------------------------------------------------|-----------------------------------------------------------------------------------------------|
| <p>Panesar RS, Albert B, Messina C, Parker M. The Effect of an Electronic SBAR Communication Tool on Documentation of Acute Events in the Pediatric Intensive Care Unit. <i>Am J Med Qual.</i> 2016;31(1):64-68.</p>                                                             | <p>No eligible outcome (focused on documentation quality for event notes)</p>                 |
| <p>Ramasubbu B, Stewart E, Spiritoso R. Introduction of the identification, situation, background, assessment, recommendations tool to improve the quality of information transfer during medical handover in intensive care. <i>J Intensive Care Soc.</i> 2017;18(1):17-23.</p> | <p>No eligible outcome (focused on documentation compliance and quality)</p>                  |
| <p>Raymond M, Harrison MC. The structured communication tool SBAR (Situation, Background, Assessment and Recommendation) improves communication in neonatology. <i>S Afr Med J.</i> 2014;104(12):850-852.</p>                                                                    | <p>No eligible outcome (only one observer judged fidelity to SBAR)</p>                        |
| <p>Stevens N, McNiesh S, Goyal D. Utilizing an SBAR Workshop With Baccalaureate Nursing Students to Improve Communication Skills. <i>Nurs Educ Perspect.</i> 2020;41(2):117-118.</p>                                                                                             | <p>No eligible outcome (self-reported knowledge and attitudes to SBAR)</p>                    |
| <p>Toru V, Anggorowati, Santoso A. Effects of SBAR communication through telephone on the improvement of effective communication in implementing the patient safety program. <i>Pakistan Journal of Medical &amp; Health Sciences</i> 2018;12(3):1334-1339.</p>                  | <p>No eligible outcome (only one observer judged communication outcomes)</p>                  |
| <p>Woodhall LJ, Vertacnik L, McLaughlin M. Implementation of the SBAR communication technique in a tertiary center. <i>J Emerg Nurs.</i> 2008;34(4):314-317.</p>                                                                                                                 | <p>No eligible outcome (self-reported knowledge and attitudes to SBAR)</p>                    |
| <p>Yu M, Kang KJ. Effectiveness of a role-play simulation program involving the sbar technique: A quasi-experimental study. <i>Nurse Educ Today.</i> 2017;53:41-47.</p>                                                                                                          | <p>No eligible outcome (only one observer judged SBAR fidelity and clarity communication)</p> |

Supplementary Table 2. Study characteristics and outcomes

| Author, Year                       | Study design              | Setting                                                                                 | Study purpose and intervention                                                                                                                                                                                    | Type of communication                                                                                                                                                                                | Outcome(s) included in review                                                                                |
|------------------------------------|---------------------------|-----------------------------------------------------------------------------------------|-------------------------------------------------------------------------------------------------------------------------------------------------------------------------------------------------------------------|------------------------------------------------------------------------------------------------------------------------------------------------------------------------------------------------------|--------------------------------------------------------------------------------------------------------------|
| <i>Classroom-based studies*</i>    |                           |                                                                                         |                                                                                                                                                                                                                   |                                                                                                                                                                                                      |                                                                                                              |
| Cunningham, 2012 <sup>25</sup>     | RCT                       | University-affiliated hospital in Australia (Classroom)                                 | To determine if teaching SBAR to junior doctors improves the quality of telephone referrals to more senior consulting physicians                                                                                  | Intradisciplinary (physician-physician) communication over telephone for help with patient                                                                                                           | Fidelity of SBAR use<br>Clarity of Communication                                                             |
| Marshall, 2009 <sup>26</sup>       | RCT                       | Medical school in Australia (Classroom)                                                 | Teach ISBAR to final year medical students to improve how they communicate key clinical information in telephone referrals to consultant physicians                                                               | Intradisciplinary (physician-physician) telephone communication from students seeking help with patient management from supervising physicians                                                       | Fidelity of SBAR use<br>Clarity of Communication                                                             |
| McCrary, 2012 <sup>44</sup>        | Uncontrolled before-after | Academic medical centre in US (Classroom)                                               | To improve communication between pediatric residents about deteriorating patients by teaching them a modified version of SBAR                                                                                     | Intradisciplinary (physician-physician) communication between pediatric residents calling rapid response team                                                                                        | Fidelity of SBAR use                                                                                         |
| Uhm, 2019 <sup>27</sup>            | Controlled before-after   | Nursing school and hospital in South Korea (Classroom)                                  | To use experiential learning focused on SBAR to improve communication clarity and effectiveness for final-year nursing students concerning changes in patient status to physicians                                | Interdisciplinary (nurse-physician) for communicating potentially concerning changes in patient status                                                                                               | Fidelity of SBAR use<br>Clarity of Communication                                                             |
| <i>Studies in clinical setting</i> |                           |                                                                                         |                                                                                                                                                                                                                   |                                                                                                                                                                                                      |                                                                                                              |
| Abbaszade, 2020 <sup>48</sup>      | Uncontrolled before-after | Coronary care units at 2 public hospitals in Iran                                       | To improve quality of nursing care by implementing SBAR at bedside nursing shift change                                                                                                                           | Intra disciplinary (nurse-nurse) communication for bedside shift change                                                                                                                              | Impact beyond communication<br>• patient satisfaction                                                        |
| Andreoli, 2010 <sup>31</sup>       | Controlled before-after   | Two clinical units in a rehabilitation hospital at an academic medical center in Canada | To use SBAR to improve team communication related to falls risk assessment, prevention and management                                                                                                             | Intradisciplinary and interdisciplinary - communication within clinical team (nurses, physicians, allied health professionals, unit managers, and non-clinical support staff) around fall prevention | Impact beyond communication<br>• teamwork & patient safety climate                                           |
| Beckett, 2013 <sup>43</sup>        | Uncontrolled before-after | Large regional hospital in Scotland                                                     | To reduce unexpected cardiac arrests on hospital wards through a multifaceted intervention including an early warning system, other safety initiatives, and use of SBAR for communication during nursing handover | Intradisciplinary (nurse-nurse) communication during handover at change of shift                                                                                                                     | Impact beyond communication<br>• cardiac arrest rate<br>• cardiac arrest calls to team<br>• 30-day mortality |

|                                 |                           |                                                                                           |                                                                                                                                                                                                                                           |                                                                                                                                                                                                             |                                                                                                                                                                                                                                              |
|---------------------------------|---------------------------|-------------------------------------------------------------------------------------------|-------------------------------------------------------------------------------------------------------------------------------------------------------------------------------------------------------------------------------------------|-------------------------------------------------------------------------------------------------------------------------------------------------------------------------------------------------------------|----------------------------------------------------------------------------------------------------------------------------------------------------------------------------------------------------------------------------------------------|
| Beckett, 2009 <sup>46</sup>     | Uncontrolled before-after | 5 pediatric and perinatal services units at community hospital in US                      | To improve communication, teamwork, staff satisfaction, and improved patient quality and safety by teaching SBAR to nurses and physicians from 5 units in pediatric/perinatal services department for handover                            | Interdisciplinary (nurse-physician) communication over telephone about urgent patient issues and intradisciplinary (nurse-nurse) during in-person for handover at shift change                              | Impact beyond communication <ul style="list-style-type: none"> <li>• teamwork &amp; safety climate</li> </ul>                                                                                                                                |
| De Meester, 2013 <sup>42</sup>  | Uncontrolled before-after | 16 medical and surgical wards at a tertiary hospital in Belgium                           | To use SBAR to improve communication during nurse handover as well as calls to physicians about deteriorating patients as the second phase in an initiative that first implemented a rapid response team and modified early warning score | Intradisciplinary (nurse-nurse) and interdisciplinary (nurse-physician) communication during handover at nursing change of shift and telephone calls to physicians about potentially deteriorating patients | Impact beyond communication <ul style="list-style-type: none"> <li>• unplanned ICU admissions</li> <li>• unexpected deaths</li> </ul>                                                                                                        |
| Field, 2011 <sup>24</sup>       | RCT                       | 26 Nursing homes in US                                                                    | To improve anticoagulation management of nursing home residents by implementing a protocol involving SBAR to facilitate structured telephone communication between nurses and physicians                                                  | Interdisciplinary (nurse-physician) telephone communication over possible changes to warfarin dosing given current laboratory results and relevant clinical details                                         | Impact beyond communication <ul style="list-style-type: none"> <li>• quality of anticoagulation management</li> </ul>                                                                                                                        |
| Leonard, 2019 <sup>50</sup>     | Uncontrolled before-after | Privately owned Medicaid licensed home care agency in US                                  | To improve management of care for heart failure patients by implementing modified SBAR communication tool                                                                                                                                 | Interdisciplinary (nurse-physician) communication between home health nurse and physician                                                                                                                   | Impact beyond communication <ul style="list-style-type: none"> <li>• referrals to ED</li> <li>• acute HF admissions</li> </ul>                                                                                                               |
| Ludikhuizen, 2015 <sup>40</sup> | Uncontrolled before-after | Medical and surgical units at 12 university and non-teaching hospitals in The Netherlands | To improve timely recognition and management of deteriorating ward patients by implementing rapid response team, modified early warning score, and structured communication using SBAR                                                    | Interdisciplinary (nurse-physician) communication ward nurses requesting help for patients with concerning early warning scores and physicians on medical emergency team                                    | Impact beyond communication <ul style="list-style-type: none"> <li>• composite of cardiopulmonary arrest, unplanned ICU admission, or death</li> <li>• cardiopulmonary arrest</li> <li>• unplanned ICU admission</li> <li>• death</li> </ul> |
| Mullany, 2016 <sup>39</sup>     | Uncontrolled before-after | University-affiliated tertiary Hospital in Australia                                      | To improve recognition and management of deteriorating ward patients by implementing a rapid response system including a medical emergency team, use of a modified early warning score and ISBAR tool for communication                   | Interdisciplinary (nurse-physician) communication between ward nurse requesting help and physician on medical emergency team                                                                                | Impact beyond communication <ul style="list-style-type: none"> <li>• hospital mortality</li> <li>• in-hospital cardiac arrest</li> <li>• emergency ICU admissions</li> </ul>                                                                 |



|                                                  |                           |                                                                    |                                                                                                                                                                                                               |                                                                                                                                                                                                                              |                                                                                                                                                                                                                     |
|--------------------------------------------------|---------------------------|--------------------------------------------------------------------|---------------------------------------------------------------------------------------------------------------------------------------------------------------------------------------------------------------|------------------------------------------------------------------------------------------------------------------------------------------------------------------------------------------------------------------------------|---------------------------------------------------------------------------------------------------------------------------------------------------------------------------------------------------------------------|
| Potts, 2018 <sup>34</sup>                        | Uncontrolled before-after | Academic medical centre in US                                      | To improve handover from the ED to medical units receiving newly admitted patient by changing from unstructured verbal handover to structured tool informed by SBAR and embedded in electronic medical record | Intradisciplinary (nurse-nurse) communication between ED nurse and nurse on medical ward                                                                                                                                     | Impact beyond communication <ul style="list-style-type: none"> <li>• efficiency of patient flow</li> </ul>                                                                                                          |
| Randmaa, 2014 <sup>28</sup> & 2016 <sup>29</sup> | Controlled before-after   | 2 Hospitals in Sweden                                              | To evaluate the effects of structured communication using SBAR on post-operative handover                                                                                                                     | Interdisciplinary handover communication from operating room personnel (nurses or physicians) to nurses in post-anaesthesia care unit                                                                                        | Clarity of Communication<br>Impact beyond communication <ul style="list-style-type: none"> <li>• teamwork &amp; safety climate</li> <li>• incident reports involving communication errors</li> </ul>                |
| Sermersheim, 2020 <sup>49</sup>                  | Uncontrolled before-after | Academic medical centre in US                                      | To improve handover of patients moving to lateral or lower levels of care units by implementing SBAR-based handover tool embedded in electronic medical record                                                | Intradisciplinary (nurse-nurse) communication between ED nurse and nurse on medical ward                                                                                                                                     | Impact beyond communication <ul style="list-style-type: none"> <li>• efficiency of patient flow (patient throughput, aka assign-to-occupy time)</li> </ul>                                                          |
| Shahid, 2020 <sup>47</sup>                       | Uncontrolled before-after | Paediatric referral hospital in Canada                             | To improve communication between neonatal transport team members and physicians about patients in need of urgent transportation from referring hospital by implementing modified SBAR                         | Interdisciplinary (nurse-physician) communication over telephone between neonatal transport team members or nurses operating from remote sites and physicians providing decision-making support at receiving care facilities | Fidelity of SBAR use<br>Clarity of Communication                                                                                                                                                                    |
| Smith, 2018 <sup>35</sup>                        | Uncontrolled before-after | University hospital in US                                          | To use structured communication based on a modified version of SBAR to improve at handover from ED to medical unit for newly admitted patients                                                                | Intradisciplinary (physician-physician) telephone communication between ED physician and physician on medical unit                                                                                                           | Fidelity of SBAR use<br>Quality of Communication                                                                                                                                                                    |
| Street, 2018 <sup>33</sup>                       | Uncontrolled before-after | Post-anaesthesia care units at 3 affiliated hospitals in Australia | To use a structured communication tool (ISOBAR) to improve handover for post-operative patients                                                                                                               | Intradisciplinary (nurse-nurse) communication between post-anaesthetic care unit and ward receiving patient                                                                                                                  | Impact beyond communication <ul style="list-style-type: none"> <li>• nurses' recognition of and responsiveness to common postoperative complications</li> <li>• adverse events</li> <li>• length of stay</li> </ul> |
| Telem, 2011 <sup>30</sup>                        | Controlled before-after   | Academic medical centre in US                                      | To improve daily handoffs among surgical residents by incorporating SBAR                                                                                                                                      | Intradisciplinary (physician-physician) communication about patient status at end-of- shift handover                                                                                                                         | Impact beyond communication <ul style="list-style-type: none"> <li>• sentinel events</li> <li>• physician order entry errors</li> </ul>                                                                             |

|                                     |                           |                                                              |                                                                                                                                               |                                                                                                                                                      |                                                                                                                                                                                        |
|-------------------------------------|---------------------------|--------------------------------------------------------------|-----------------------------------------------------------------------------------------------------------------------------------------------|------------------------------------------------------------------------------------------------------------------------------------------------------|----------------------------------------------------------------------------------------------------------------------------------------------------------------------------------------|
| Thompson, 2011 <sup>45</sup>        | Uncontrolled before-after | Tertiary teaching hospital in Australia                      | To improve communication between medical trainees at end of shift handover by teaching them ISBAR                                             | Intradisciplinary (physician-physician) communication between junior doctor finishing shift and incoming colleague                                   | Fidelity of SBAR use                                                                                                                                                                   |
| Ting, 2017 <sup>38</sup>            | Uncontrolled before-after | Obstetrics department in hospital in Taiwan                  | To evaluate the effects of implementing SBAR when nurses communicate abnormal fetal heart tracings to obstetricians                           | Interdisciplinary (nurse-physician) telephone communication between nurse in labour and delivery unit and covering obstetrician                      | Impact beyond communication <ul style="list-style-type: none"> <li>• teamwork &amp; safety climate</li> <li>• Apgar scores</li> </ul>                                                  |
| Townsend-Gervis, 2014 <sup>41</sup> | Uncontrolled before-after | 3 medical/surgical units at an acute care hospital in US     | To improve patient outcomes through structured communication using SBAR in daily interdisciplinary rounds                                     | Intradisciplinary (nurse-nurse) communication for shift reports<br><br>Interdisciplinary (nurse-allied health) communication during rounds           | Impact beyond communication <ul style="list-style-type: none"> <li>• patient satisfaction</li> <li>• appropriate removal of urinary catheters</li> <li>• 30-day readmission</li> </ul> |
| Uhm, 2018 <sup>36</sup>             | Uncontrolled before-after | Paediatric hospital in South Korea                           | To improve communication about patients being transferred from intensive care to general ward by using structured handover tool based on SBAR | Intradisciplinary (nurse-nurse) communication between intensive care nurse and nurse receiving patient on ward                                       | Fidelity of SBAR use                                                                                                                                                                   |
| Velji, 2008 <sup>32</sup>           | Controlled before-after   | Stroke unit at an academic rehabilitation hospital in Canada | To use SBAR to improve communication among team members regarding both urgent and non-urgent patient safety issues                            | Intradisciplinary and interdisciplinary - team general communication (e.g., change in patient care plan, discharge planning, specific safety issues) | Impact beyond communication <ul style="list-style-type: none"> <li>• team communication and patient safety climate</li> </ul>                                                          |
| Vlitos, 2016 <sup>51</sup>          | Uncontrolled before-after | 2 adult mental health units in Scotland                      | To improve communication between multidisciplinary team members by implementing modified SBAR communication tool                              | Interdisciplinary (nurse-physician) communication between ward staff and physician on duty                                                           | Clarity of Communication                                                                                                                                                               |
| Wilson, 2017 <sup>37</sup>          | Uncontrolled before-after | Paediatric referral hospital in Canada                       | To improve quality of communication about patients in need of urgent transportation from referring hospitals by implementing SBAR             | Interdisciplinary (nurse-physician-respiratory therapist) communication over telephone between inter-hospital transport team and receiving hospital  | Fidelity of SBAR use<br>Clarity of Communication                                                                                                                                       |

RCT – Randomized controlled trial; SBAR – Situation, Background, Assessment, Recommendation; ISBAR – Identification of self followed by standard SBAR; ISOBAR – Introduction/Identification, Situation, Observation, Background, Assessment, Request (for action to be performed by recipient of handover); ED – Emergency Department; US – United States

\* The setting is characterised as in classroom when the outcomes were measured in a simulation centre or classroom setting. Some studies taught participants how to perform SBAR using simulation but then measured use of SBAR in clinical practice. Such studies were not considered to take place in the classroom.

**Supplementary Figure 1a. Risk of Bias Assessment of Included Studies using ROB 2.0**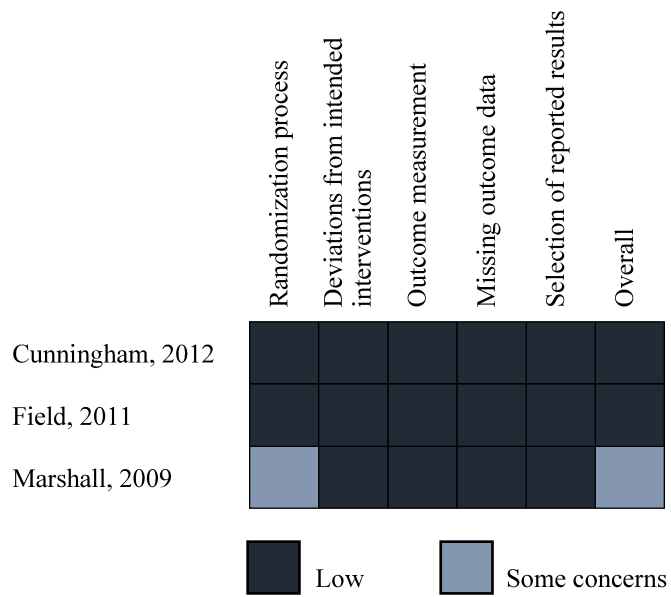

**Supplementary Figure 1b. Risk of Bias Assessment of Included Studies using ROBINS-I tool**

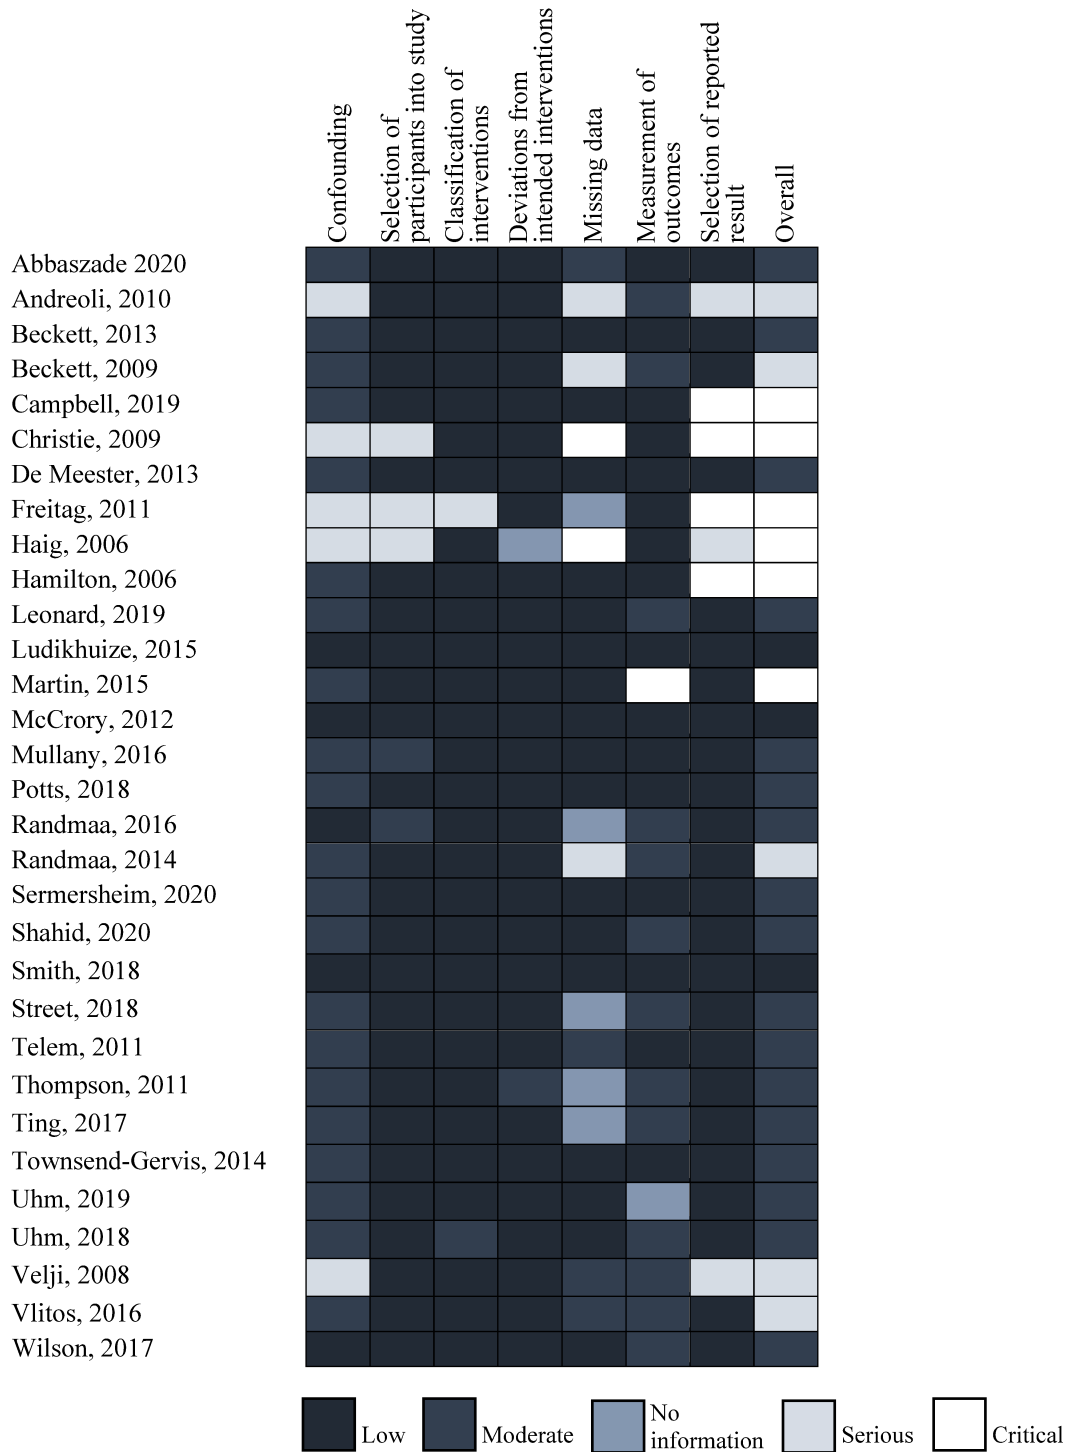

Supplementary Table 3. Effect of SBAR on impacts beyond communication

| Author, Year                   | SBAR intervention                                                                                                                                                                                                              | SBAR training modality, duration and intensity                                                                            | Intervention components other than SBAR                                                                                                                               | Outcome Measures                                                                                                                             | Reported Results                                                                                                                                                                                                                      | Relative improvement                                                  |
|--------------------------------|--------------------------------------------------------------------------------------------------------------------------------------------------------------------------------------------------------------------------------|---------------------------------------------------------------------------------------------------------------------------|-----------------------------------------------------------------------------------------------------------------------------------------------------------------------|----------------------------------------------------------------------------------------------------------------------------------------------|---------------------------------------------------------------------------------------------------------------------------------------------------------------------------------------------------------------------------------------|-----------------------------------------------------------------------|
| Abbaszade, 2020 <sup>48</sup>  | SBAR training and implementation for nurses for nurse-nurse communication at shift change in coronary care units                                                                                                               | Didactic for 1 hr (offered 5 times)                                                                                       | None                                                                                                                                                                  | Patient Satisfaction (Quality Patient Care Scale)                                                                                            | Psychosocial Dimension: 55.34 ± 12.27 (pre) to 67.70 ± 7.26 (post), p<0.001<br>Physical Dimension: 48.86 ± 15.90 (pre) to 60.18 ± 7.82 (post), p<0.001<br>Communicative Dimension: 23.86 ± 7.57 (pre) to 30.09 ± 4.61 (post), p<0.001 | Moderate (22%)<br>Moderate (23%)<br>Moderate (26%)                    |
| Andreoli, 2010 <sup>31</sup>   | SBAR implementation and training for nurses, physicians, other health disciplines, support staff, unit leaders in geriatric and the musculoskeletal rehabilitation units for communication for falls prevention and management | Didactic and role-playing for 4h                                                                                          | None                                                                                                                                                                  | Patient safety culture (AHRQ Hospital Survey on Patient Safety Culture)                                                                      | Between the study units and rest of the hospital, 2 of the 12 dimensions (organizational learning, and teamwork across hospital units), significant based on critical ratio test                                                      | Small* (10% - 18%)                                                    |
| Beckett, 2013 <sup>43</sup>    | SBAR implementation and training for nursing handover in acute admissions unit                                                                                                                                                 | Not reported                                                                                                              | Early warning system and other larger safety initiatives targeting cardiac arrest rate                                                                                | Cardiac arrests / 1000 admissions<br>Cardiac arrest calls from AAU to team / 1000 admissions<br>30-day mortality of patients admitted to AAU | 2.8 (pre) to 0.8 (post), significant (p-value unreported)<br>4.9 (pre) to 1.3 (post), significant (p-value unreported)<br>6.3% (pre) to 4.8% (post), significant (p-value unreported)                                                 | Large (71%)<br>Large (73%)<br>Moderate (24%)                          |
| Beckett, 2009 <sup>46</sup>    | SBAR training for nurses and physicians (though none attended) in pediatric / perinatal services department for nurse-physician communication for multiple purposes, including patient status                                  | Didactic, role-playing and video vignettes for 1h (offered over 16 sessions)                                              | None                                                                                                                                                                  | Safety climate (Teamwork and Safety Climate Survey)<br>Teamwork (Teamwork and Safety Climate Survey)                                         | 6 of 14 items showed statistically significant changes<br>6 of 13 items with statistically significant changes                                                                                                                        | Small to Moderate* (9% - 21%)<br>Small to Moderate* (7% - 20%)        |
| De Meester, 2013 <sup>42</sup> | SBAR training for nurses for nurse-nurse communication at rounds or shift change handover and nurse-physician communication about deteriorating patient on medical/surgical wards                                              | Didactic and role-playing for 2d on SBAR for reference nurses, for 2h on SBAR for other nurses, and 4h on early detection | Efferent Rapid Response System (included modified early warning system, emphasis on patient assessment, policy to communicate with providers of efferent limb of RRS) | Unplanned ICU admissions / 1000 admissions<br>Unexpected deaths / 1000 admissions<br>Mortality / 1000 admissions                             | 13.1 (pre) to 14.8 (post), p = 0.001<br>1.0 (pre) to 0.3 (post), p<0.001<br>10.3 (pre) to 10.6 (post), not significant                                                                                                                | Small (13%)<br><i>intended direction</i><br>Large (66%)<br>Small (3%) |

|                                 |                                                                                                                                                                                                      |                                         |                                                                                                                                              |                                                                                                                                                                                                                  |                                                                                                                                                                                            |                                                             |
|---------------------------------|------------------------------------------------------------------------------------------------------------------------------------------------------------------------------------------------------|-----------------------------------------|----------------------------------------------------------------------------------------------------------------------------------------------|------------------------------------------------------------------------------------------------------------------------------------------------------------------------------------------------------------------|--------------------------------------------------------------------------------------------------------------------------------------------------------------------------------------------|-------------------------------------------------------------|
| Field, 2011 <sup>24</sup>       | Implementation of clinically-embedded paper SBAR template (with prompts) and SBAR training to standardize nurse-physician telephone communication about residents on warfarin in nursing homes       | Not reported                            | Warfarin protocol, (includes methods to identify and highlight residents on warfarin, procedures for tracking and communicating INR results) | Time INR values in therapeutic range<br>INR $\geq$ 4.5 obtaining follow-up INR within 3 days<br>Preventable adverse warfarin-related events / 100 resident months                                                | SBAR exposure: 53.1% vs Control: 50.0%, significant (p-value unreported)<br>SBAR exposure: 64.6% vs Control: 71.7%, not significant<br>SBAR exposure: 2.3 vs Control: 2.4, not significant | Small (6%)<br>Small (10%)<br>Small (5%)                     |
| Leonard, 2019 <sup>50</sup>     | SBAR implementation and training for nurses for nurse-physician communication for immediate help with patient                                                                                        | Didactic                                | None                                                                                                                                         | Referrals to ED<br>Acute HF admissions                                                                                                                                                                           | 0/10 (pre) to 0/11 (post)<br>5/10 (pre) to 0/11 (post)                                                                                                                                     | No effect<br>Large (100%)                                   |
| Ludikhuijze, 2015 <sup>40</sup> | SBAR implementation and training for nurses and physicians for nurse-physician communications of modified early warning score $\geq$ 3 for immediate assessment of patient in medical/surgical wards | Not reported                            | Rapid Response System (includes modified early warning system)                                                                               | Cardiopulmonary arrest, unplanned ICU admission, or death / 1000 admissions<br>Cardiopulmonary arrests / 1000 admissions<br>In-hospital mortality / 1000 admissions<br>Unplanned ICU admission / 1000 admissions | 37.1 (pre) to 32.9 (post), p=0.04<br>1.9 (pre) to 1.2 (post), p=0.02<br>20.4 (pre) to 17.7 (post), p=0.05<br>19.8 (pre) to 17.7 (post), not significant                                    | Small (11%)<br>Moderate (37%)<br>Small (13%)<br>Small (11%) |
| Mullany, 2016 <sup>39</sup>     | ISBAR training for nurses and physician for escalation of patient status in teaching hospital                                                                                                        | Role-playing for 2h in single session   | Rapid Response System (includes medical emergency team and modified early warning system)                                                    | MET calls / 1000 separations<br>Cardiac arrest calls / 1000 separations                                                                                                                                          | 8.2 (pre) to 9.5 (post), significance unreported<br>5.5 (pre) to 3.3 (post), p <0.001                                                                                                      | Small (16%)<br>Moderate (40%)                               |
| Potts, 2018 <sup>34</sup>       | Implementation of clinically-embedded SBAR for nursing handover from ED to medical unit                                                                                                              | Didactic for 1h on 3 shifts of work day | None                                                                                                                                         | RTM-to-occupied times                                                                                                                                                                                            | 83.6 min (pre) to 49 min (3 weeks post), significance not reported<br>83.6 min (pre) to 47 min (10 months post), significance not reported                                                 | Large (41%)<br>Large (44%)                                  |
| Randmaa, 2014 <sup>28</sup>     | SBAR implementation and training for nurses and physicians in anaesthetic clinic for nurse-nurse communication and nurse-physician communication for multiple purposes, including handoffs           | Didactic and role-playing for 2.5h      | None                                                                                                                                         | Safety climate (Safety Attitudes Questionnaire)                                                                                                                                                                  | 63.1 $\pm$ 15.8 (pre) to 66.4 $\pm$ 16.2 (post), p=0.011                                                                                                                                   | Small (5%)                                                  |
| Sermersheim, 2020 <sup>49</sup> | Implementation of clinically-embedded electronic SBAR tool for nursing handover between units (e.g., ED to general medical unit)                                                                     | Didactic                                | None                                                                                                                                         | Assign-to-occupied times                                                                                                                                                                                         | 97 min (pre) to 55 min (1 week post), significance not reported<br>97 min (pre) to 60 min (2.5 years post), significance not reported                                                      | Large (43%)<br>Moderate (38%)                               |

|                                     |                                                                                                                                                                                                                                             |                                                                        |                                                                                                         |                                                                         |                                                                                                                                                                                         |                       |
|-------------------------------------|---------------------------------------------------------------------------------------------------------------------------------------------------------------------------------------------------------------------------------------------|------------------------------------------------------------------------|---------------------------------------------------------------------------------------------------------|-------------------------------------------------------------------------|-----------------------------------------------------------------------------------------------------------------------------------------------------------------------------------------|-----------------------|
| Street, 2018 <sup>33</sup>          | Implementation of iSoBAR (with prompts) within post-anaesthetic care tool (PACT) and training (targeting nurses) for nurse-nurse handover on discharge in three PACUs                                                                       | Not reported                                                           | Other parts of PACT: e.g., additional assessment criteria for patient readiness for discharge from PACU | Recognition of Adverse events in PACU                                   | 8.3% (pre) to 16.7% (post), p<0.001                                                                                                                                                     | Large (101%)          |
|                                     |                                                                                                                                                                                                                                             |                                                                        |                                                                                                         | LOS in PACU for all patients in mins                                    | 45 (pre) to 53 (post), p<0.001                                                                                                                                                          | Small (18%)           |
|                                     |                                                                                                                                                                                                                                             |                                                                        |                                                                                                         | LOS in PACU for patients with PACU adverse event in mins                | 100 (pre) to 84 (post), p=0.027                                                                                                                                                         | Small (16%)           |
|                                     |                                                                                                                                                                                                                                             |                                                                        |                                                                                                         | LOS in hospital for all PACU patients in days                           | 0.5 (pre) to 1.0 (post), p=0.026                                                                                                                                                        | Large (100%)          |
| Telem, 2011 <sup>30</sup>           | SBAR training for general surgery interns for nurse-physician communication for immediate help with patient and physician-physician communication about patient status at handover                                                          | Video scenario discussions and role-playing for 2.5h in single session | None                                                                                                    | Duplicated, cancelled, and wrong patient order entries                  | SBAR exposure: 14.5% (pre) to 12.2% (post), p=0.003                                                                                                                                     | Small (16%)           |
| Ting, 2017 <sup>38</sup>            | SBAR Implementation and training for nurses to support nurse-physician communication when abnormal fetal heart beat tracings occurred in obstetrics department                                                                              | Didactic and video demonstrations for 15 mins                          | None                                                                                                    | Safety climate (Safety Attitudes Questionnaire)                         | 61.1 ± 10.9 (pre) to 71.0 ± 15.5 (2nd post), p=0.0007                                                                                                                                   | Small (16%)           |
|                                     |                                                                                                                                                                                                                                             |                                                                        |                                                                                                         | Teamwork (Safety Attitudes Questionnaire)                               | 58.6 ± 11.2 (pre) to 70.8 ± 15.1 (2nd post), p=0.006                                                                                                                                    | Moderate (21%)        |
|                                     |                                                                                                                                                                                                                                             |                                                                        |                                                                                                         | Number of neonates with <7 5-minute scores                              | 4.3% (pre) to 5% (post), p=0.49                                                                                                                                                         | Small (16%)           |
| Townsend-Gervis, 2014 <sup>41</sup> | SBAR implementation and training (targeting nurses) for nurse-nurse and nurse-allied health communications in daily interdisciplinary rounds on medical/surgical units                                                                      | Didactic and role-playing                                              | Re-admission risk assessment (efforts to highlight risk factors in structured manner)                   | Foley catheter removal                                                  | 78% (pre) to 94% (post), p<0.001                                                                                                                                                        | Moderate (20%)        |
|                                     |                                                                                                                                                                                                                                             |                                                                        |                                                                                                         | Re-admission rate                                                       | 14.5% (pre) to 5.2% (post), p<0.001                                                                                                                                                     | Large (64%)           |
|                                     |                                                                                                                                                                                                                                             |                                                                        |                                                                                                         | Patient satisfaction                                                    | 69% (pre) to 74% (post), not significant                                                                                                                                                | Small (7%)            |
| Velji, 2008 <sup>32</sup>           | SBAR implementation and training for nurses, physicians, other health disciplines, support staff and unit leaders for nurse-nurse communication at rounds or shift change and nurse-physician communication for immediate help with patient | Didactic and role-playing for 4h                                       | None                                                                                                    | Patient safety culture (AHRQ Hospital Survey on Patient Safety Culture) | Between the study unit and rest of the hospital, 2 of the 12 dimensions (organizational learning, and feedback and communication about error), significant based on critical ratio test | Moderate* (25% - 42%) |

SBAR – Situation, Background, Assessment, Recommendation; ISBAR – Identification of self followed by SBAR; iSoBAR – Identification of self and patient,

Situation, Observations, Background, Agreed plan, Read back

\*refers only to items that are statistically significant
