# Supplementary figures and images for: Can SBAR be implemented with high fidelity and does it improve communication between healthcare workers? A systematic review
Source: PubMed Central journal article supplement — BMJ Open. 2021 Dec 17;11(12):e055247. doi: 10.1136/bmjopen-2021-055247 (PMC8685965; doi:10.1136/bmjopen-2021-055247), 2021-12-17

**Supplementary Figure 1a. Risk of Bias Assessment of Included Studies using ROB 2.0**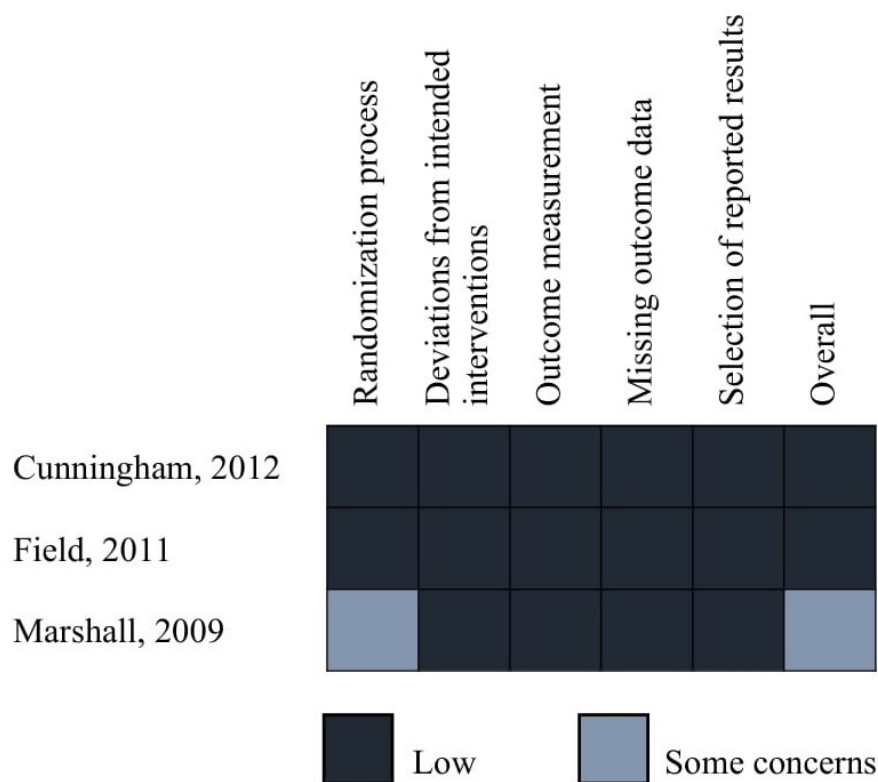

Supplement: bmjopen-2021-055247supp002.pdf [file bmjopen-2021-055247supp002.pdf]

**Supplementary Figure 1b. Risk of Bias Assessment of Included Studies using ROBINS-I tool**

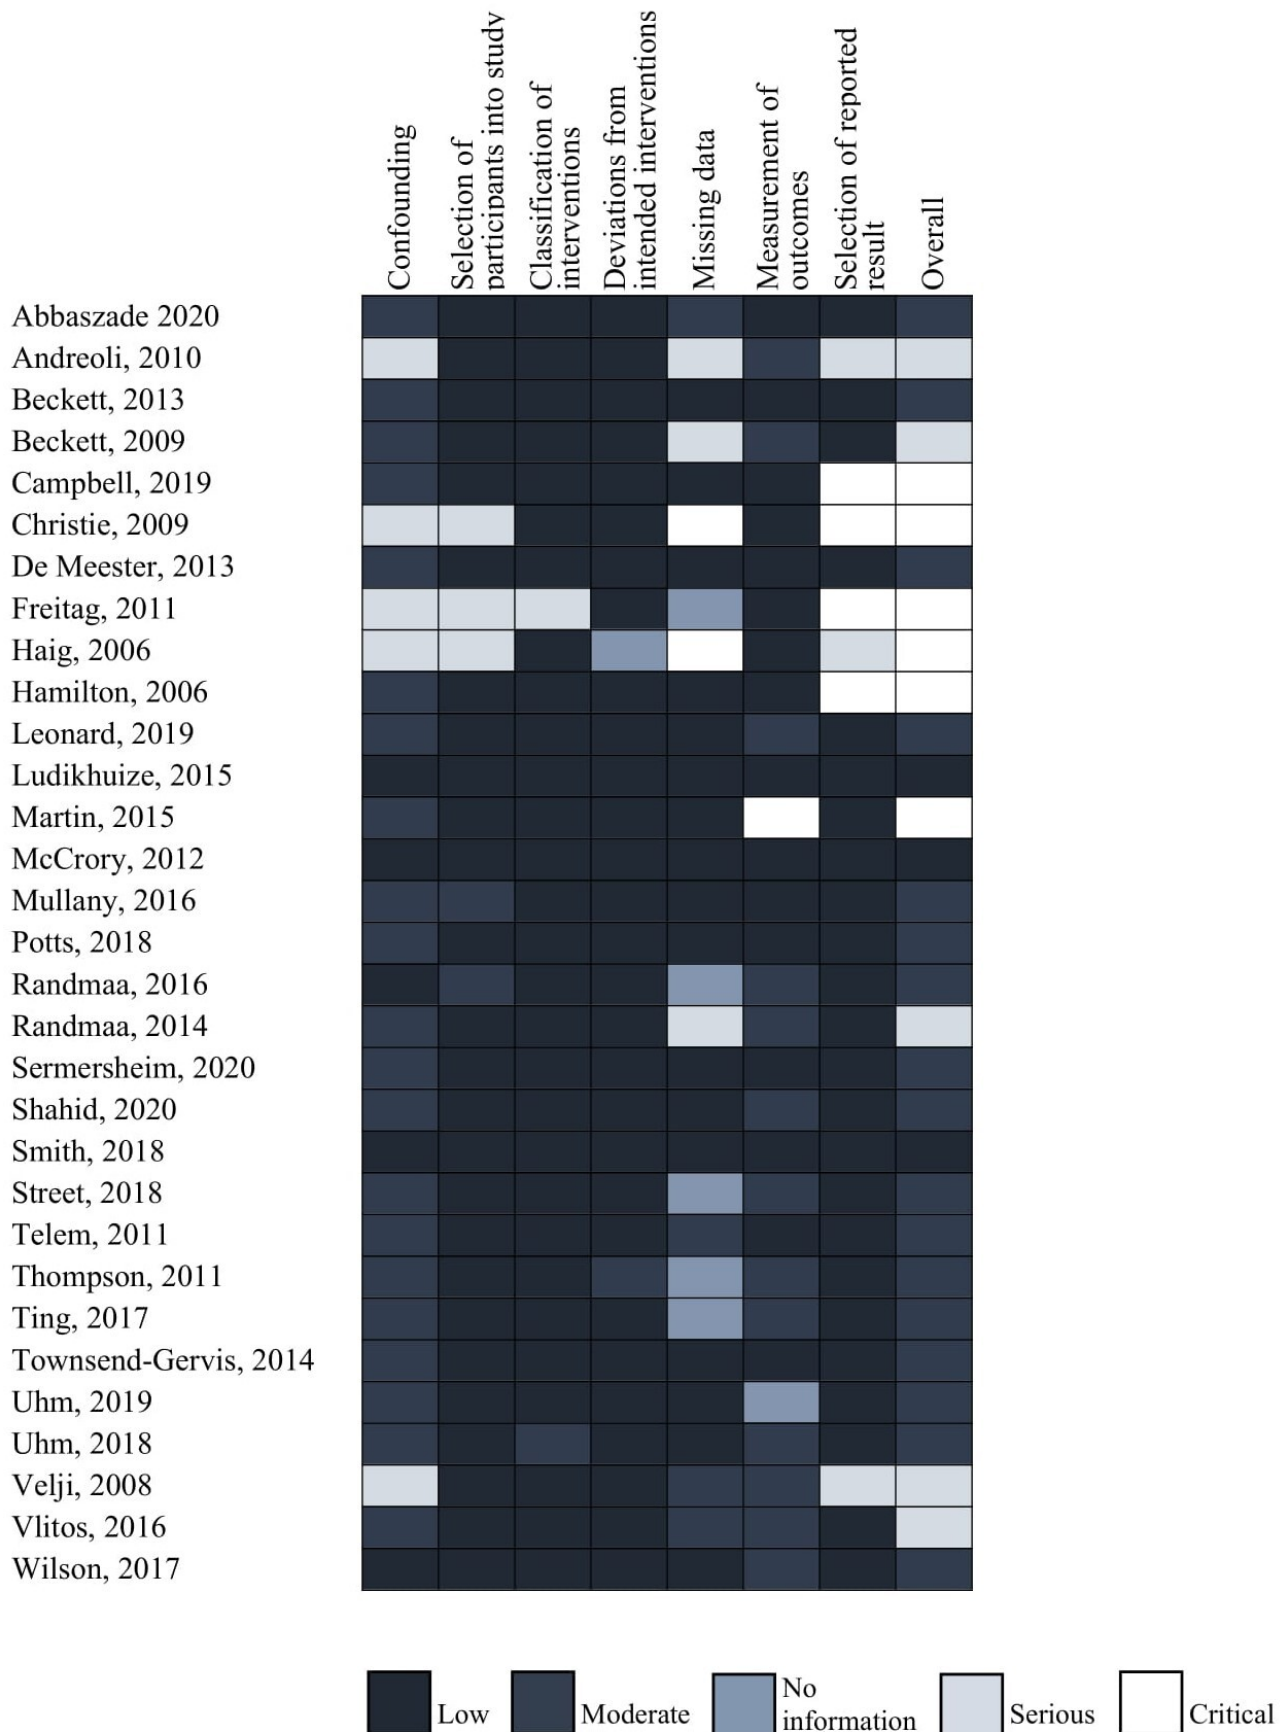

Supplement: bmjopen-2021-055247supp003.pdf [file bmjopen-2021-055247supp003.pdf]
